# Supplementary material for: Aggregation induced emission (AIE) based donor–π–acceptor fluorophores: an approach to fabricate acidochromic sensors and white light emitting diodes
Source: Royal Society of Chemistry journal article supplement (doi:10.1039/d4tc02617a), 2024-01-01
Supplement: d4tc02617a1.pdf [file d4tc02617a1.pdf]

## Supplementary Information

### **Aggregation Induced Emission (AIE) based Donor- $\pi$ -acceptor Fluorophores: An approach to fabricate acidochromic sensors and white light emitting diodes**

Snigdhamayee Rana<sup>a</sup>, Sivakumar Vaidyanathan<sup>b\*</sup>, Sabita Patel<sup>a\*</sup>

<sup>a</sup>Department of Chemistry, National Institute of Technology Rourkela, Rourkela-769 008, Odisha, India. E-mail: [sabitap@nitrkl.ac.in](mailto:sabitap@nitrkl.ac.in)

<sup>b</sup>Department of Chemistry, Indian Institute of Technology, Hyderabad, Kandi, Sangareddy-502285, Telangana, India. E-mail: [vsiva@chy.iith.ac.in](mailto:vsiva@chy.iith.ac.in)

## Table of Content

|                                                                                                               | Page No |
|---------------------------------------------------------------------------------------------------------------|---------|
| 1. Synthesis                                                                                                  |         |
| 1.1. Synthesis of Synthesis procedure of 4-Bromotriphenylamin.....                                            | 3       |
| 1.2. Synthesis of 1-(4-Bromophenyl)-1,2,2-triphenylethylene .....                                             | 3-4     |
| 2. NMR spectra.....                                                                                           | 5-12    |
| 3. HRMS data .....                                                                                            | 12-13   |
| 4. IR spectra <b>TPASCNP</b> y and <b>TPESCNP</b> y.....                                                      | 13      |
| 5. Crystal data of <b>TPASCNP</b> y.....                                                                      | 14-15   |
| 6. Lippert- Mataga equation: .....                                                                            | 15-16   |
| 7. Fluorescence spectra of <b>TPASCNP</b> y and <b>TPESCNP</b> y in thin film and THF: water<br>fraction..... | 17      |
| 8. Application on paper strips.....                                                                           | 17      |
| 9. The optimized geometry coordinates for <b>TPASCNP</b> y.....                                               | 18-19   |
| 10. The optimized geometry coordinates for <b>TPESCNP</b> y.....                                              | 20-22   |

## 1. Synthesis

### 1.1. Synthesis procedure of 4-Bromotriphenylamine:

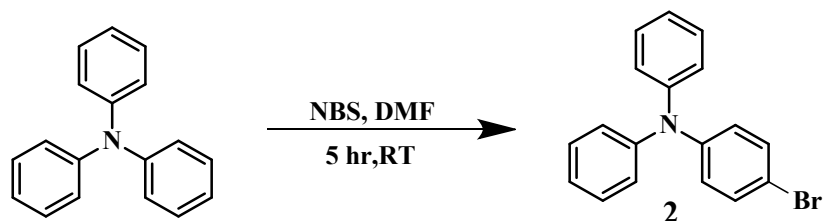

**Scheme S1:** Synthesis procedure for 4-Bromotriphenylamine.

To a solution of triphenylamine (1g, 4.08 mmol) was added n-Bromosuccinimide (577 mg, 4.89 mmol) was stirred with THF (20 mL) under nitrogen atmosphere at room temperature for 20 hr. Then the reaction was quenched by adding water and extracted with dichloromethane three times. The combined organic layers were dried over anhydrous  $\text{Na}_2\text{SO}_4$  and the solvent was removed in vacuo. Finally, the crude product was purified by silica column chromatography to afford 4-Bromotriphenylamine as a white amorphous solid (62% yield).  $^1\text{H}$  NMR (400 MHz,  $\text{CDCl}_3$ )  $\delta$  7.36 – 7.32 (m, 2H), 7.31 – 7.25 (m, 4H), 7.12 – 7.03 (m, 6H), 7.00 – 6.95 (m, 2H);  $^{13}\text{C}$  NMR (101 MHz,  $\text{CDCl}_3$ )  $\delta$  147.38, 147.03, 132.16, 129.39, 125.14, 124.42, 123.23, 114.76. (Fig. S1 and S2)

### 1.2. Synthesis procedure of 1-(4-Bromophenyl)-1,2,2-triphenylethylene:

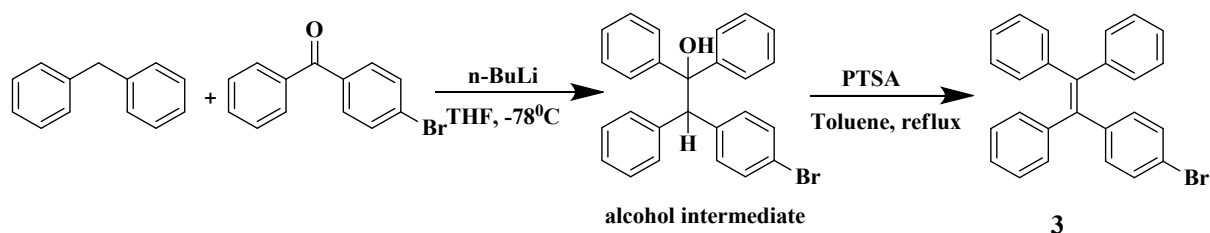

**Scheme S2:** Synthesis procedure for 1-(4-Bromophenyl)-1,2,2-triphenylethylene.

Diphenylmethane, n-butyllithium, and 4-bromobenzophenone were used as starting materials in a low-temperature reaction setup to synthesize 1-(4-Bromophenyl)-1,2,2-triphenylethylene.

Under nitrogen atmosphere, n-Butyllithium (2 M in hexane, 0.59 mmol) was added dropwise at -78°C to the colorless stirred mixture of dry THF (10mL) and diphenylmethane (0.59 mmol) and was allowed to stir for 20 min at -78°C. The colourless reaction mixture turned yellowish-orange after the addition of n-butyllithium. The yellowish-orange mixture was then mixed with a solution of 4-bromobenzophenone (0.49 mmol) in dry THF (10 mL), which was then stirred for 30 minutes at -78°C. After that, the reaction mixture was stirred at room temperature for 12 hours. Following the end of the reaction, the mixture was quenched with an aqueous solution of ammonium chloride before being extracted with dichloromethane (3 x 50 mL). The solvent evaporation process was then carried out to produce the alcohol intermediate by collecting and drying the dichloromethane layers over anhydrous sodium sulphate. The alcohol intermediate was then dissolved in toluene (60 mL), to which p-toluene sulfonic acid (PTSA) (30 mg) was added, and the mixture was refluxed for 16 hours. As soon as the reaction was finished, the mixture was cooled to room temperature and evaporated on a rotary evaporator. The resulting crude residue was then purified using column chromatography and hexane to get 1-(4-Bromophenyl)-1,2,2-triphenylethylene as a white solid (yield 20%).

Alcohol intermediate <sup>1</sup>H NMR (400 MHz, CDCl<sub>3</sub>) δ 7.83 (d, *J* = 7.5 Hz, 1H), 7.78 (d, *J* = 8.3 Hz, 1H), 7.50 – 7.43 (m, 6H), 7.37 (d, *J* = 4.3 Hz, 6H), 7.34 – 7.25 (m, 8H), 7.21 – 7.16 (m, 3H), 5.80 (s, 1H). (Fig. S3)

<sup>1</sup>H NMR (400 MHz, CDCl<sub>3</sub>) δ 7.28 (s, 1H), 7.24 (d, *J* = 7.7 Hz, 3H), 7.14 (d, *J* = 10.2 Hz, 11H), 7.04 (s, 3H), 6.92 (d, *J* = 7.7 Hz, 2H). <sup>13</sup>C NMR (101 MHz, CDCl<sub>3</sub>) δ 143.41, 143.33, 143.22, 142.71, 141.61, 139.66, 132.98, 131.29, 131.24, 131.22, 130.85, 127.88, 127.78, 127.68, 126.70, 126.64, 126.59, 120.44. (Fig. S4 and S5)

## 2. NMR Spectra

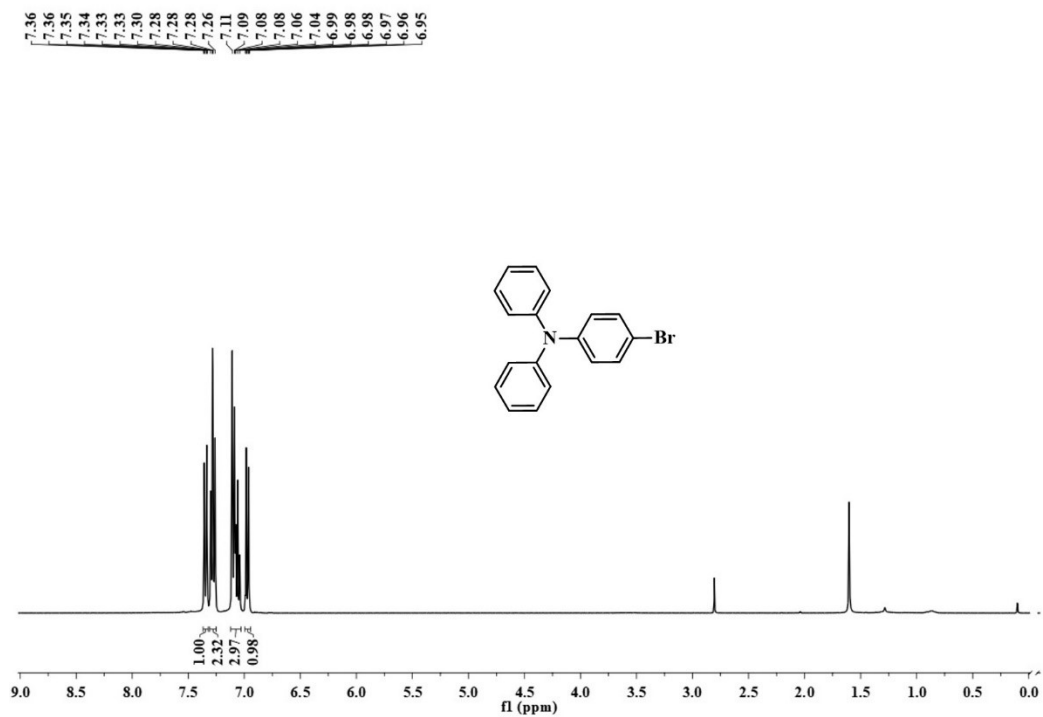

Fig. S1 <sup>1</sup>H NMR spectrum of 4-Bromotriphenylamine in CDCl<sub>3</sub>.

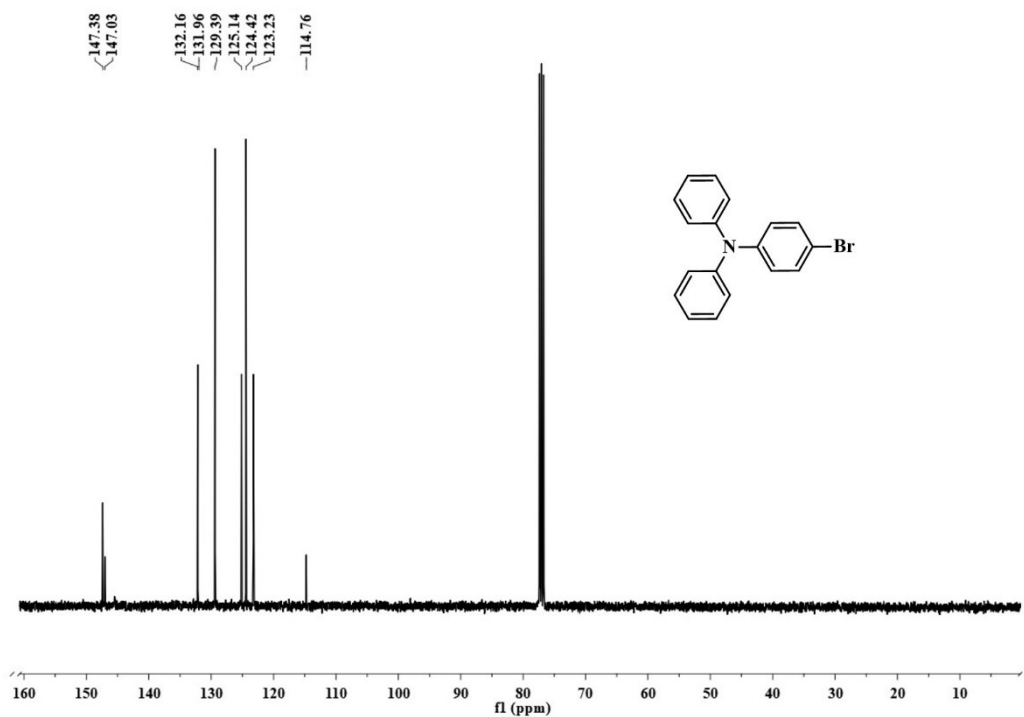

Fig. S2 <sup>13</sup>C NMR spectrum of 4-Bromotriphenylamine in CDCl<sub>3</sub>.

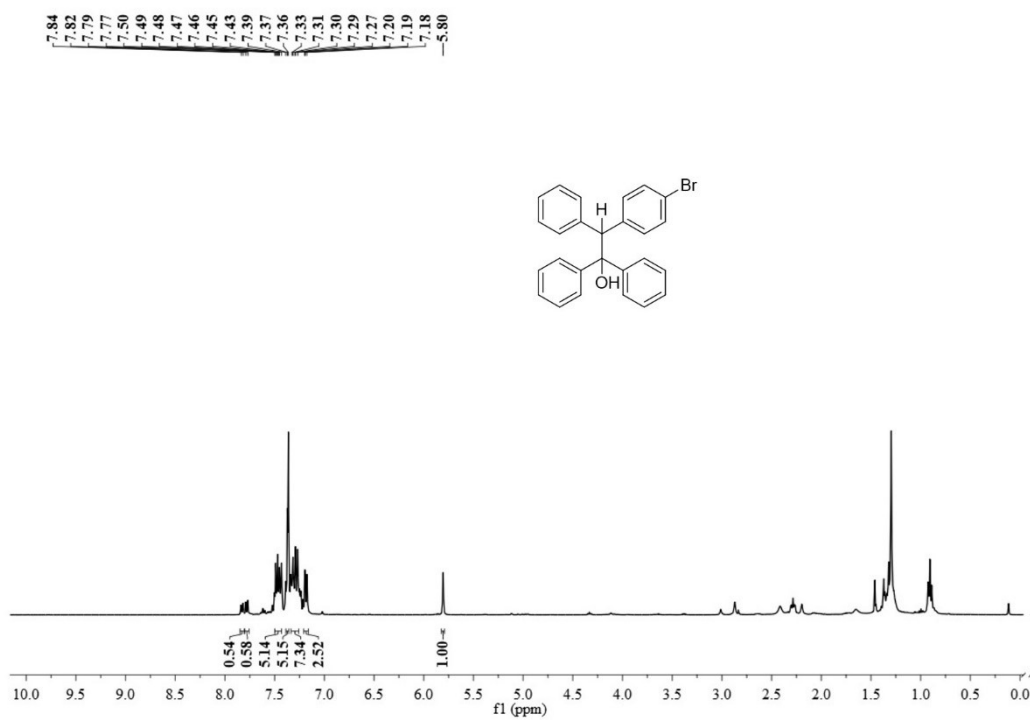

**Fig. S3** <sup>1</sup>H NMR spectrum of alcohol intermediate in CDCl<sub>3</sub>.

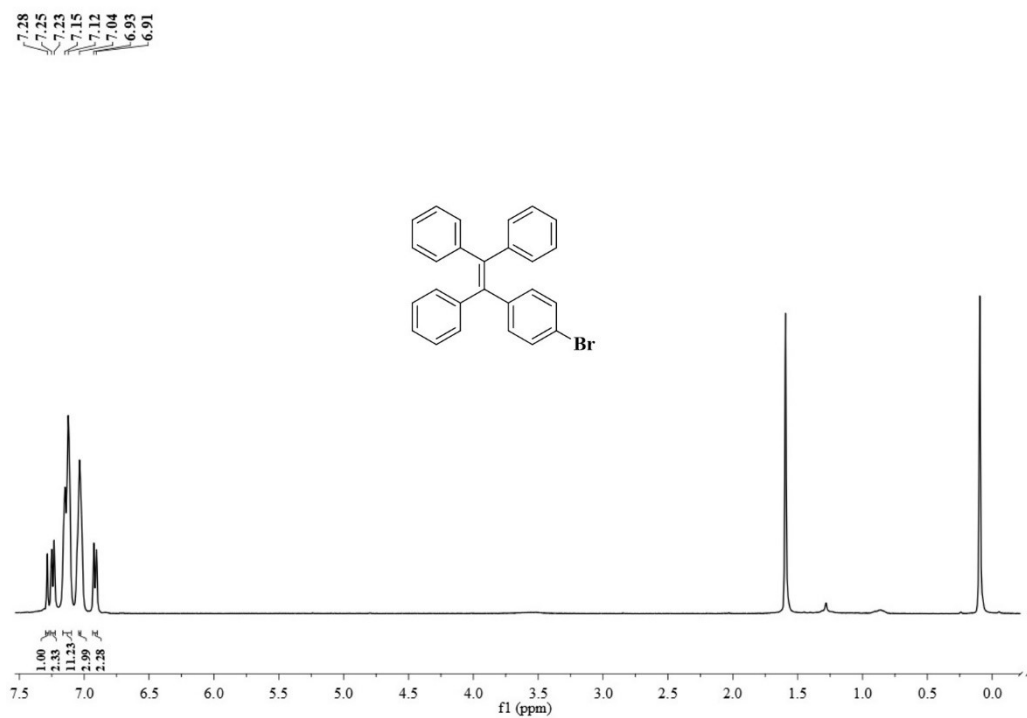

**Fig. S4** <sup>1</sup>H NMR spectrum of 1-(4-Bromophenyl)-1,2,2-triphenylethylene in CDCl<sub>3</sub>.

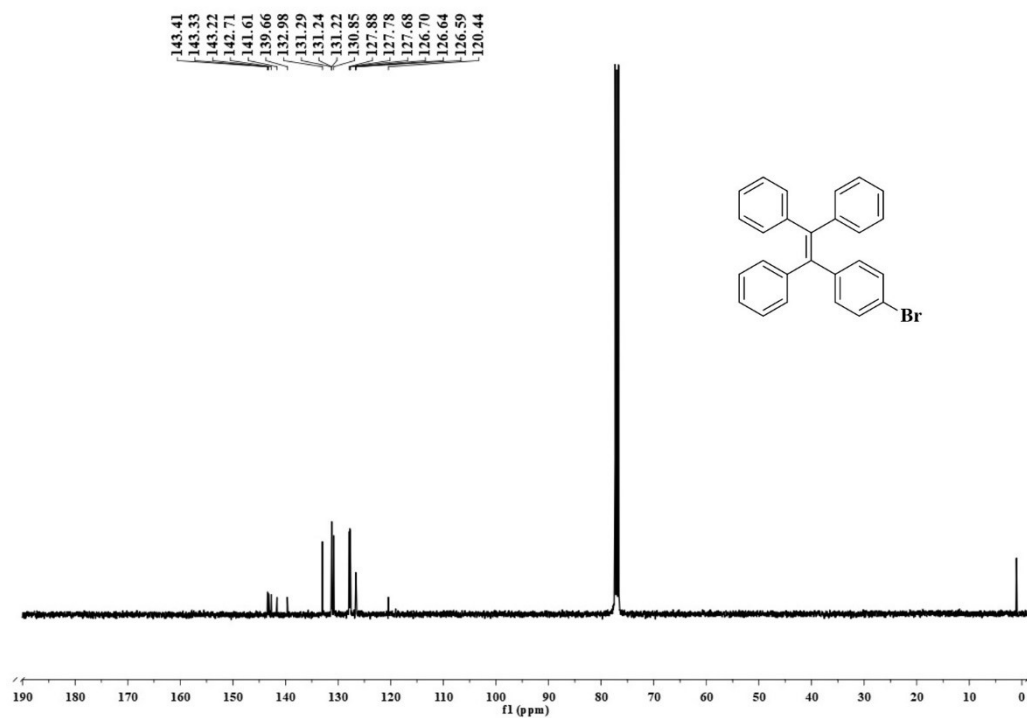

**Fig. S5** <sup>13</sup>C NMR spectrum of 1-(4-Bromophenyl)-1,2,2-triphenylethylene in CDCl<sub>3</sub>.

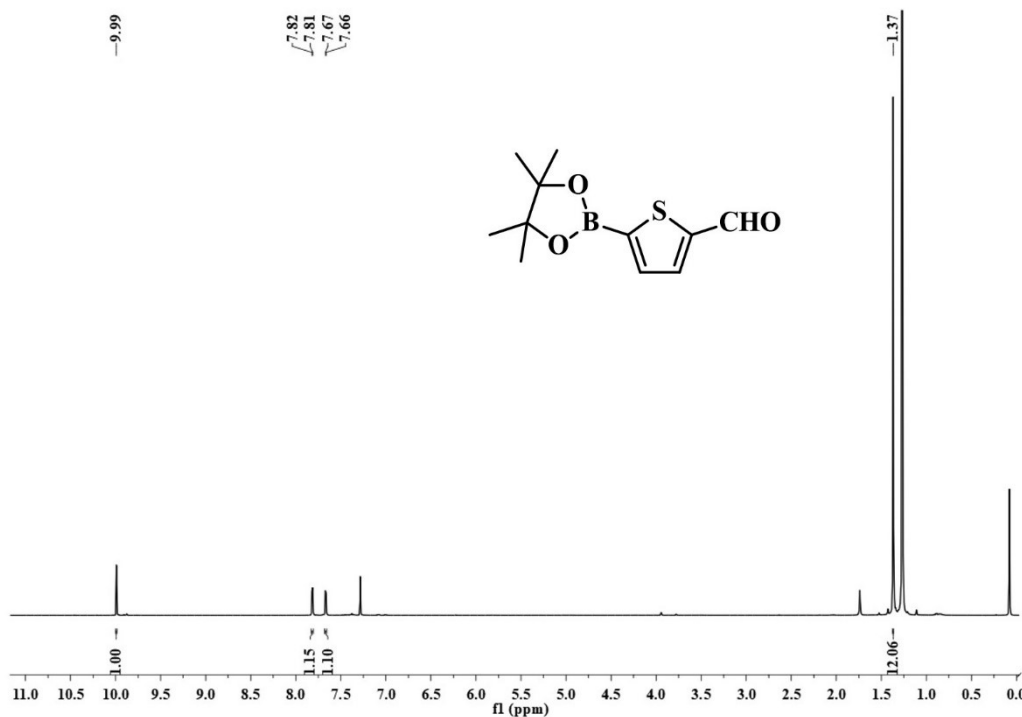

**Fig. S6** <sup>1</sup>H NMR spectrum of 5-(4,4,5,5-tetramethyl-1,3,2-dioxaborolan-2-yl) thiophene-2-carbaldehyde (**1**) in CDCl<sub>3</sub>.

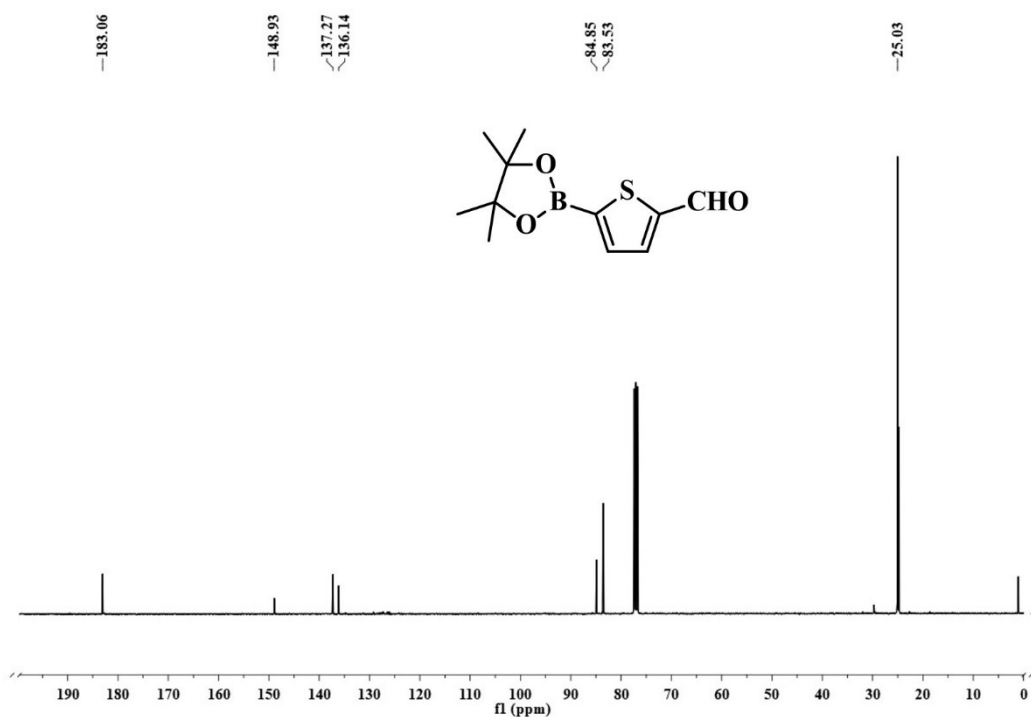

**Fig. S7**  $^{13}\text{C}$  NMR spectrum of 5-(4,4,5,5-tetramethyl-1,3,2-dioxaborolan-2-yl) thiophene-2-carbaldehyde (**1**) in  $\text{CDCl}_3$ .

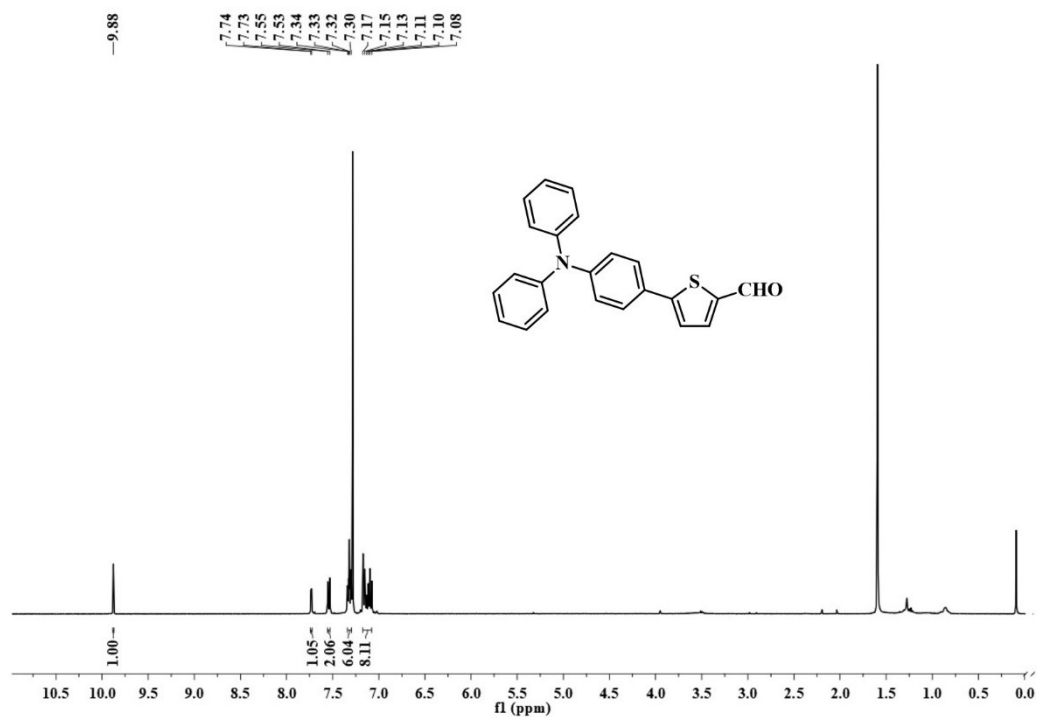

**Fig. S8**  $^1\text{H}$  NMR spectrum of 5-(4-(diphenylamino) phenyl) thiophene-2-carbaldehyde (**2**) in  $\text{CDCl}_3$ .



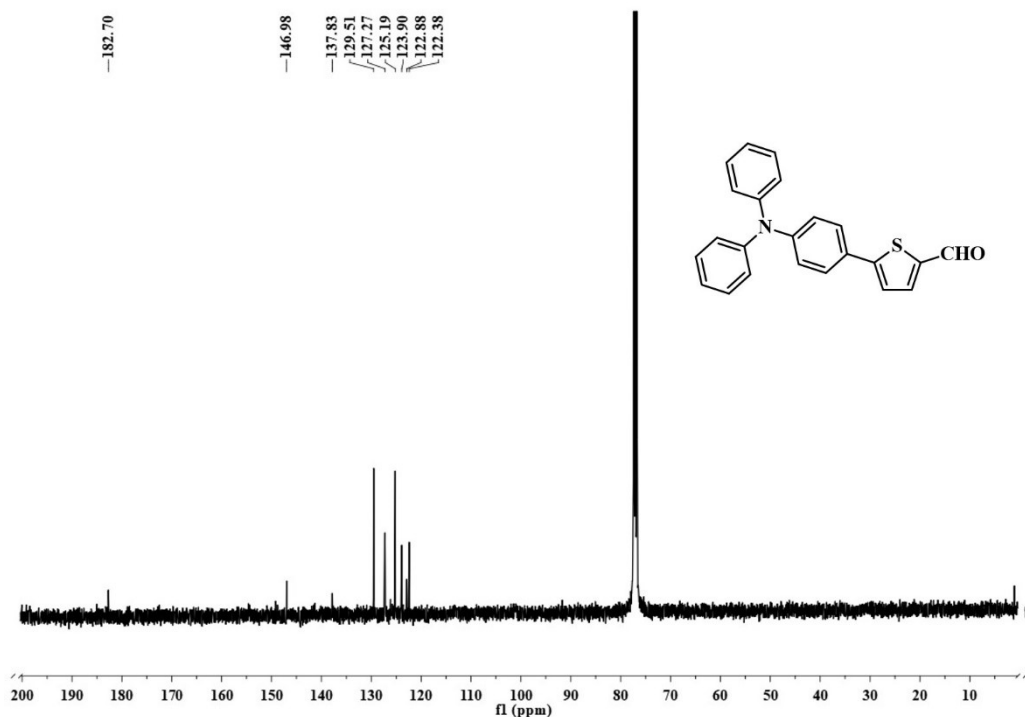

**Fig. S9** <sup>13</sup>C NMR spectrum of 5-(4-(diphenylamino) phenyl) thiophene-2-carbaldehyde (**2**) in CDCl<sub>3</sub>.

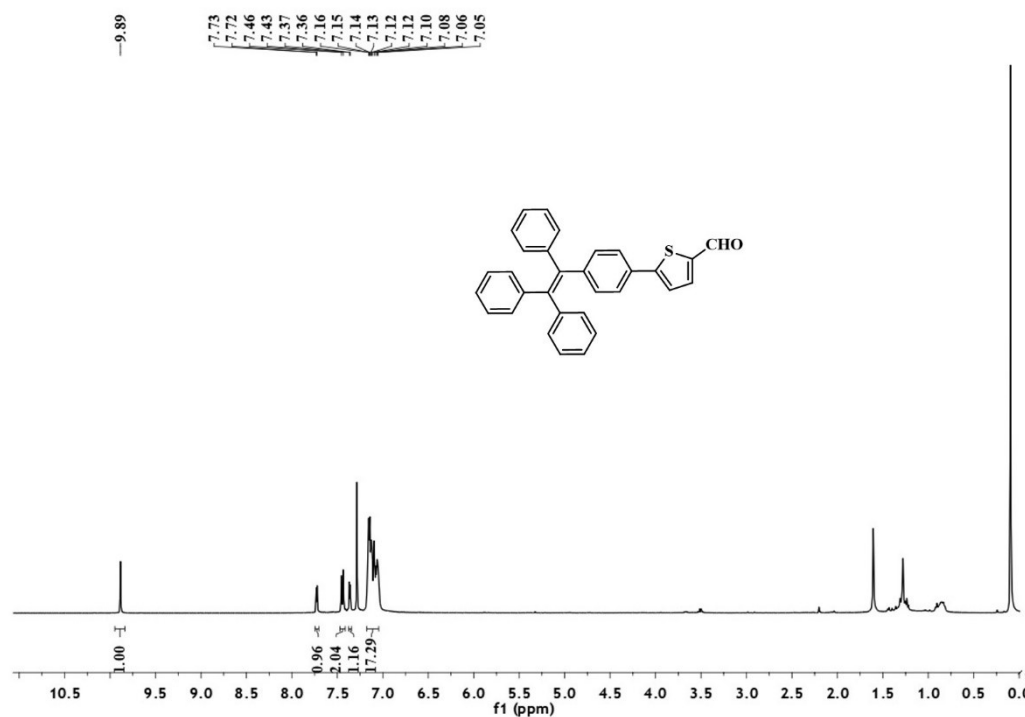

**Fig. S10** <sup>1</sup>H NMR spectrum of 5-(4-(1,2,2-triphenylvinyl) phenyl) thiophene-2-carbaldehyde (**3**) in CDCl<sub>3</sub>.

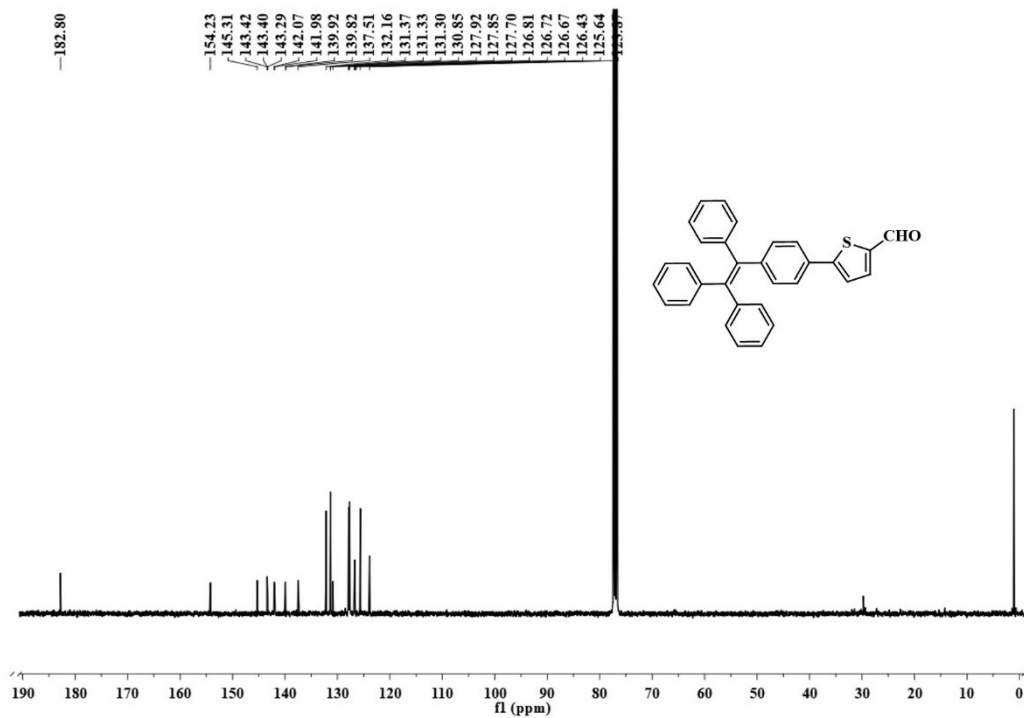

**Fig. S11** <sup>13</sup>C NMR spectrum of 5-(4-(1,2,2-triphenylvinyl) phenyl) thiophene-2-carbaldehyde (3) in CDCl<sub>3</sub>.

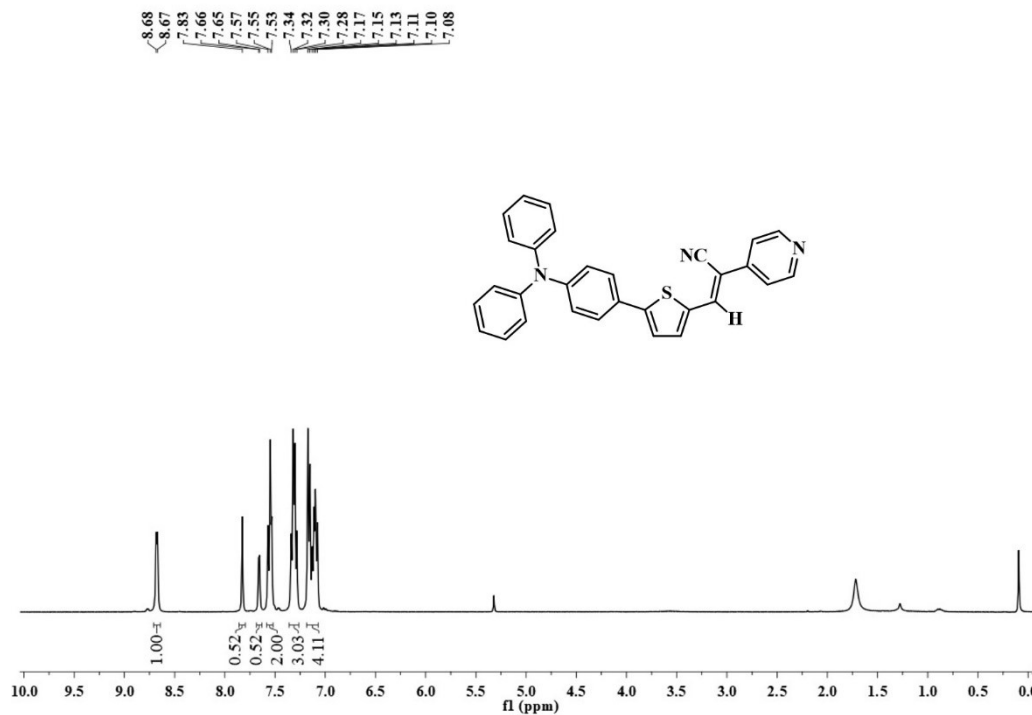

**Fig. S12** <sup>1</sup>H NMR spectrum of 3-(5-(4-(diphenylamino) phenyl) thiophen-2-yl)-2-(pyridin-4-yl) acrylonitrile (TPASCNPY) in CDCl<sub>3</sub>.

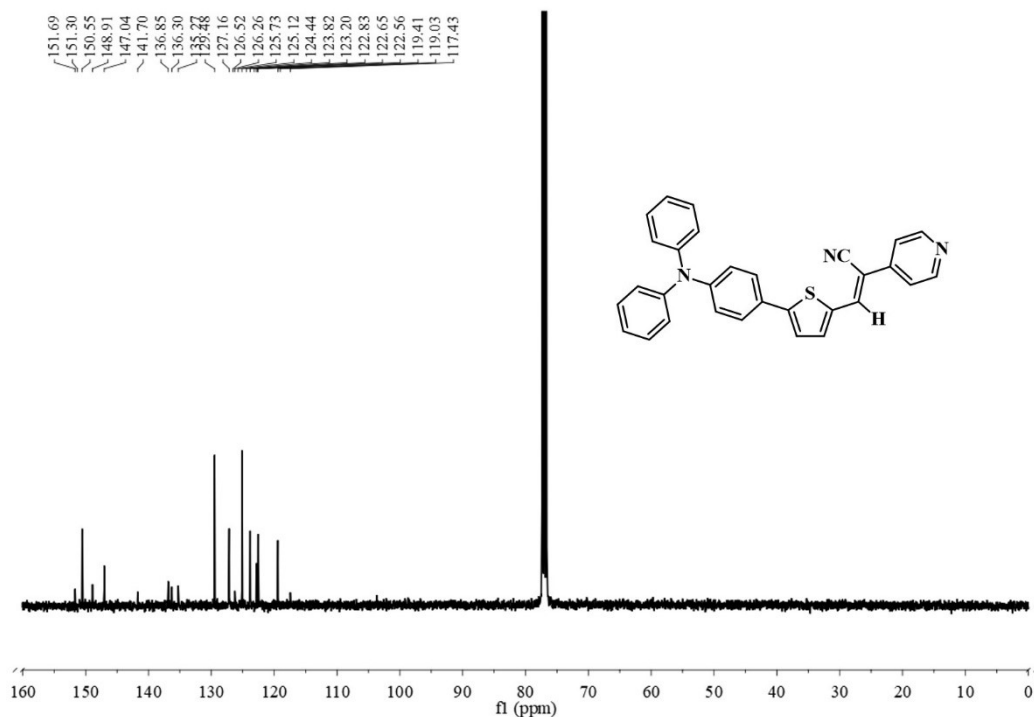

**Fig. S13**  $^{13}\text{C}$  NMR spectrum of 3-(5-(4-(diphenylamino) phenyl) thiophen-2-yl)-2-(pyridin-4-yl) acrylonitrile (TPASCNPY) in  $\text{CDCl}_3$ .

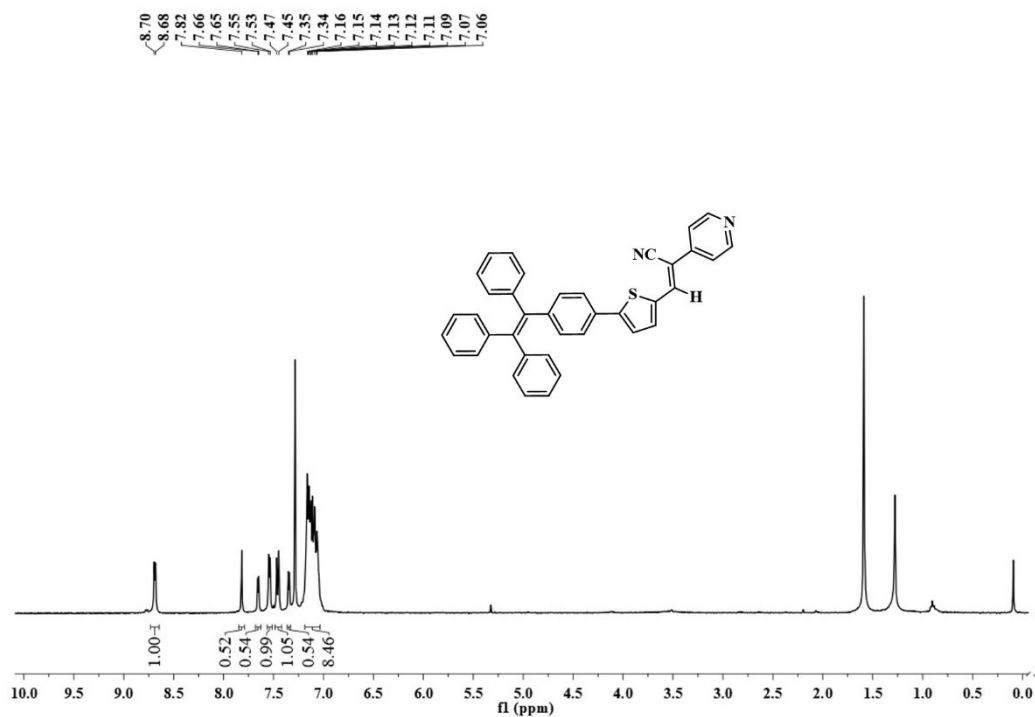

**Fig. S14**  $^1\text{H}$  NMR spectrum of 2-(pyridin-4-yl)-3-(5-(4-(1,2,2-triphenylvinyl) phenyl) thiophen-2-yl) acrylonitrile (TPESCNPY) in  $\text{CDCl}_3$ .

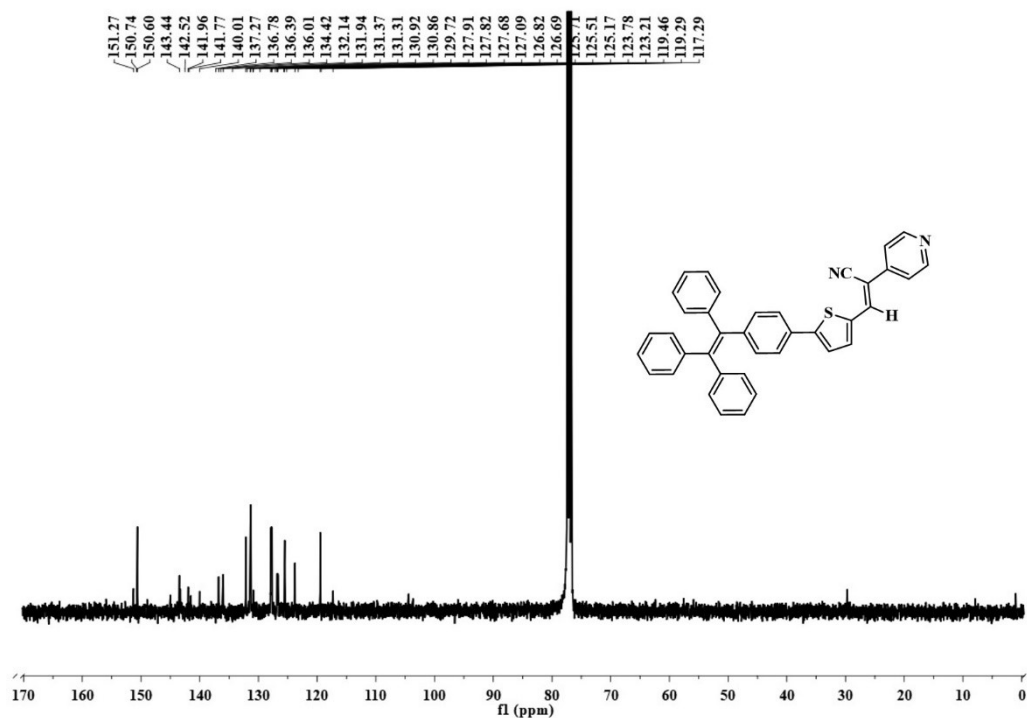

**Fig. S15**  $^{13}\text{C}$  NMR spectrum of 2-(pyridine-4-yl)-3-(5-(4-(1,2,2-triphenylvinyl) phenyl) thiophen-2-yl) acrylonitrile (TPESCNPY) in  $\text{CDCl}_3$ .

### 3. HRMS data

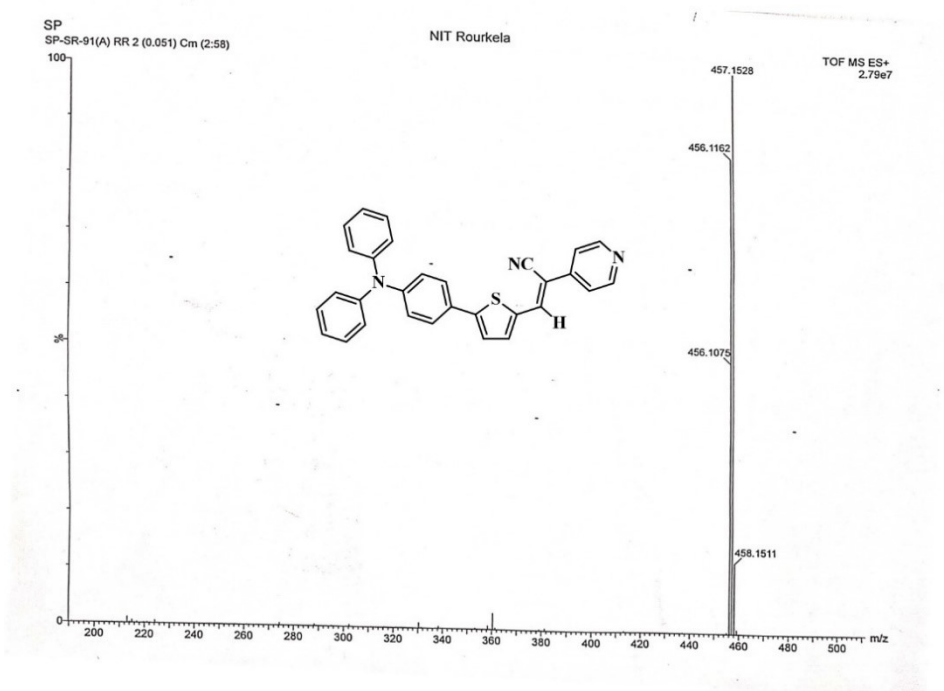

**Fig. S16** HRMS spectrum of 3-(5-(4-(diphenylamino) phenyl) thiophen-2-yl)-2-(pyridin-4-yl) acrylonitrile (TPASCNPY).

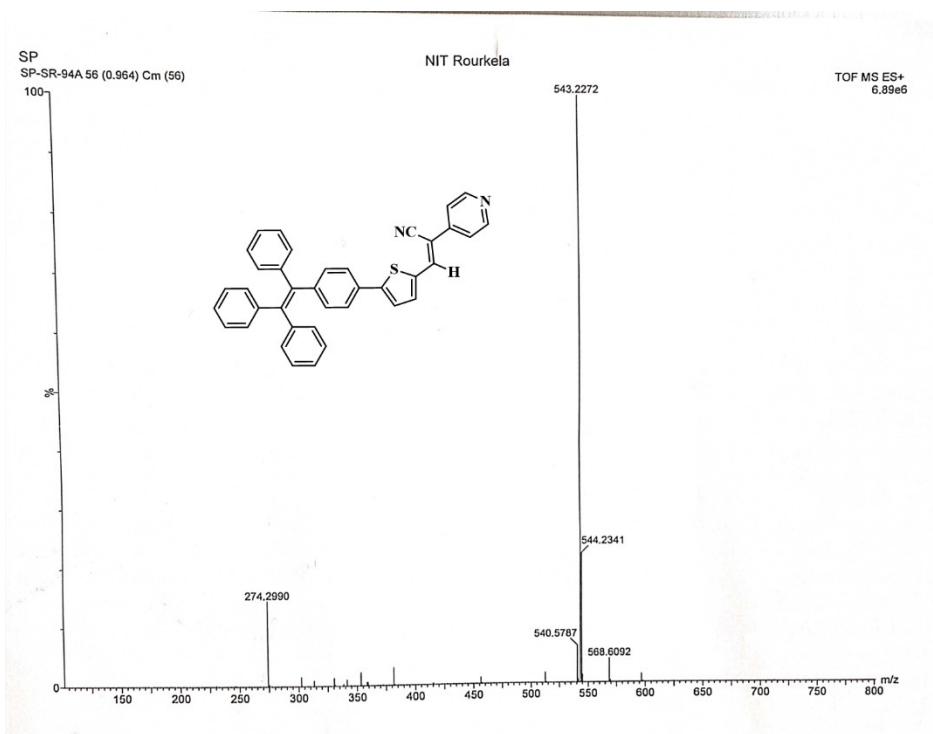

**Fig. S17** HRMS spectrum of 2-(pyridine-4-yl)-3-(5-(4-(1,2,2-triphenylvinyl) phenyl) thiophen-2-yl) acrylonitrile (TPESCNPY).

#### 4. FT-IR study of TPASCNPY and TPESCNPY

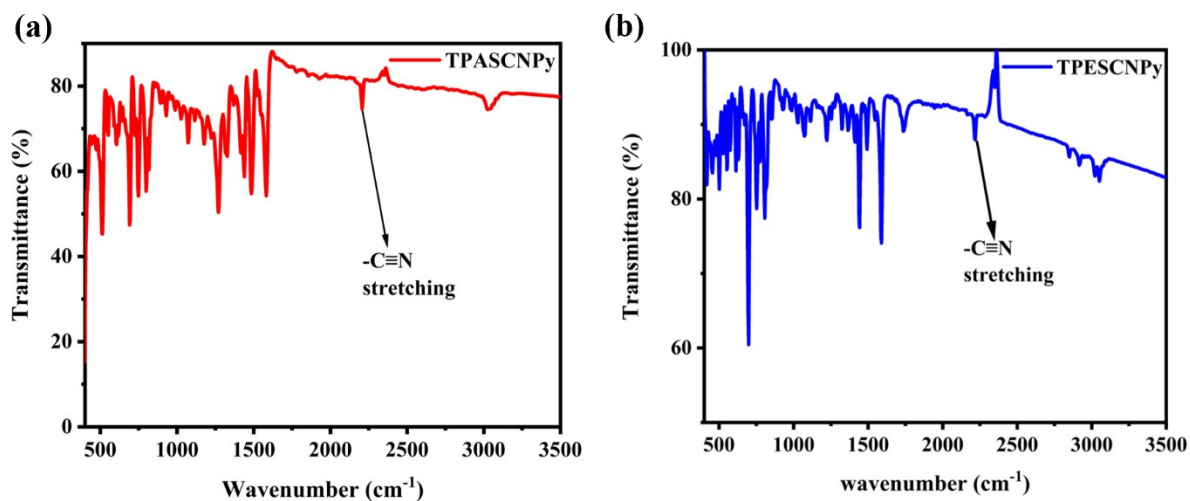

**Fig. S18** FT-IR analysis of (a) TPASCNPY (b) TPESCNPY.

## 5. Crystal data of TPASCNPpy

**Table S1. Bond Lengths for TPASCNPpy.**

| Atom | Atom | Length/Å | Atom | Atom | Length/Å |
|------|------|----------|------|------|----------|
| S1   | C22  | 1.729(2) | C21  | C22  | 1.367(3) |
| S1   | C19  | 1.723(2) | C21  | C20  | 1.394(3) |
| N1   | C12  | 1.414(2) | C13  | C14  | 1.379(3) |
| N1   | C5   | 1.417(2) | C26  | C27  | 1.384(3) |
| N1   | C13  | 1.426(2) | C26  | C30  | 1.382(3) |
| C23  | C24  | 1.345(3) | C19  | C20  | 1.368(3) |
| C23  | C22  | 1.432(3) | C6   | C1   | 1.378(3) |
| N2   | C25  | 1.142(2) | C15  | C14  | 1.375(3) |
| C24  | C25  | 1.439(3) | N3   | C28  | 1.315(3) |
| C24  | C26  | 1.481(3) | N3   | C29  | 1.319(3) |
| C16  | C17  | 1.386(3) | C7   | C8   | 1.359(3) |
| C16  | C19  | 1.466(2) | C27  | C28  | 1.384(3) |
| C16  | C15  | 1.386(3) | C4   | C3   | 1.381(3) |
| C12  | C7   | 1.386(3) | C11  | C10  | 1.397(3) |
| C12  | C11  | 1.372(3) | C30  | C29  | 1.374(3) |
| C18  | C13  | 1.377(3) | C1   | C2   | 1.362(3) |
| C18  | C17  | 1.383(2) | C8   | C9   | 1.343(4) |
| C5   | C6   | 1.387(3) | C3   | C2   | 1.370(4) |
| C5   | C4   | 1.388(3) | C9   | C10  | 1.376(4) |

**Table S2. Bond Angles for TPASCNPpy.**

| Atom | Atom | Atom | Angle/°    | Atom | Atom | Atom | Angle/°    |
|------|------|------|------------|------|------|------|------------|
| C19  | S1   | C22  | 92.26(10)  | C27  | C26  | C24  | 121.8(2)   |
| C12  | N1   | C5   | 119.95(15) | C30  | C26  | C24  | 121.9(2)   |
| C12  | N1   | C13  | 118.97(15) | C30  | C26  | C27  | 116.3(2)   |
| C5   | N1   | C13  | 119.29(16) | C18  | C17  | C16  | 121.5(2)   |
| C24  | C23  | C22  | 132.2(2)   | C16  | C19  | S1   | 122.02(16) |
| C23  | C24  | C25  | 121.06(18) | C20  | C19  | S1   | 110.63(14) |
| C23  | C24  | C26  | 122.7(2)   | C20  | C19  | C16  | 127.35(19) |
| C25  | C24  | C26  | 116.19(19) | C19  | C20  | C21  | 113.10(19) |
| C17  | C16  | C19  | 122.46(19) | C1   | C6   | C5   | 120.3(2)   |
| C15  | C16  | C17  | 117.19(18) | C14  | C15  | C16  | 121.4(2)   |
| C15  | C16  | C19  | 120.3(2)   | C28  | N3   | C29  | 114.7(2)   |
| N2   | C25  | C24  | 178.2(2)   | C8   | C7   | C12  | 120.8(2)   |
| C7   | C12  | N1   | 119.46(19) | C15  | C14  | C13  | 120.8(2)   |
| C11  | C12  | N1   | 121.27(19) | C28  | C27  | C26  | 119.4(2)   |
| C11  | C12  | C7   | 119.2(2)   | C3   | C4   | C5   | 120.8(2)   |
| C13  | C18  | C17  | 120.5(2)   | C12  | C11  | C10  | 119.3(2)   |
| C6   | C5   | N1   | 121.79(19) | C29  | C30  | C26  | 118.8(2)   |
| C6   | C5   | C4   | 118.2(2)   | C2   | C1   | C6   | 120.8(2)   |
| C4   | C5   | N1   | 119.98(19) | N3   | C28  | C27  | 124.8(3)   |

|            |     |     |            |    |     |     |          |
|------------|-----|-----|------------|----|-----|-----|----------|
| <b>C22</b> | C21 | C20 | 114.09(19) | C9 | C8  | C7  | 120.2(3) |
| <b>C23</b> | C22 | S1  | 127.10(17) | C2 | C3  | C4  | 119.9(2) |
| <b>C21</b> | C22 | S1  | 109.92(15) | C1 | C2  | C3  | 120.0(2) |
| <b>C21</b> | C22 | C23 | 122.98(19) | C8 | C9  | C10 | 120.9(3) |
| <b>C18</b> | C13 | N1  | 120.3(2)   | C9 | C10 | C11 | 119.4(3) |
| <b>C18</b> | C13 | C14 | 118.52(18) | N3 | C29 | C30 | 126.0(3) |
| <b>C14</b> | C13 | N1  | 121.18(19) |    |     |     |          |

## 6. Lippert–Mataga equation:

The Lippert–Mataga (L–M) theory describes the solvent dependency of spectral shifts as given in Equation S1.

$$\Delta\nu = \nu_a - \nu_f = \frac{2}{hc} \left( \frac{\epsilon - 1}{2\epsilon + 1} - \frac{n^2 - 1}{2n^2 + 1} \right) \frac{(\mu_E - \mu_G)^2}{a^3} + \text{Constant} \dots\dots\dots (S1)$$

$$\nu_a = \frac{1}{\lambda_{abs}}, \nu_f = \frac{1}{\lambda_{em}} \text{ and } \Delta f = \left( \frac{\epsilon - 1}{2\epsilon + 1} - \frac{n^2 - 1}{2n^2 + 1} \right) \dots\dots\dots (S2)$$

Equation 1 shows that the Stokes shift ( $\Delta\bar{\nu}$ ) depends on the dipole moments of the fluorophore in the ground ( $\mu_G$ ) and the excited ( $\mu_E$ ) state, respectively. It also depends on the dielectric constant ( $\epsilon$ ) and the refractive index ( $\eta$ ) of the corresponding solvent.  $\nu_a$  and  $\nu_f$  represent the wavenumbers of the absorption and the fluorescence emission, respectively,  $h$  is the Planck's constant,  $c$  is the speed of light in vacuum, and  $a$  is the Onsager radius of the cavity in which the fluorophore resides.  $\Delta f$  is the orientation polarizability of the solvent (Equation S2). Plotting the Stokes shift as a function of the orientation polarizability of the solvents gives the Lippert–Mataga plot (Fig. S19).

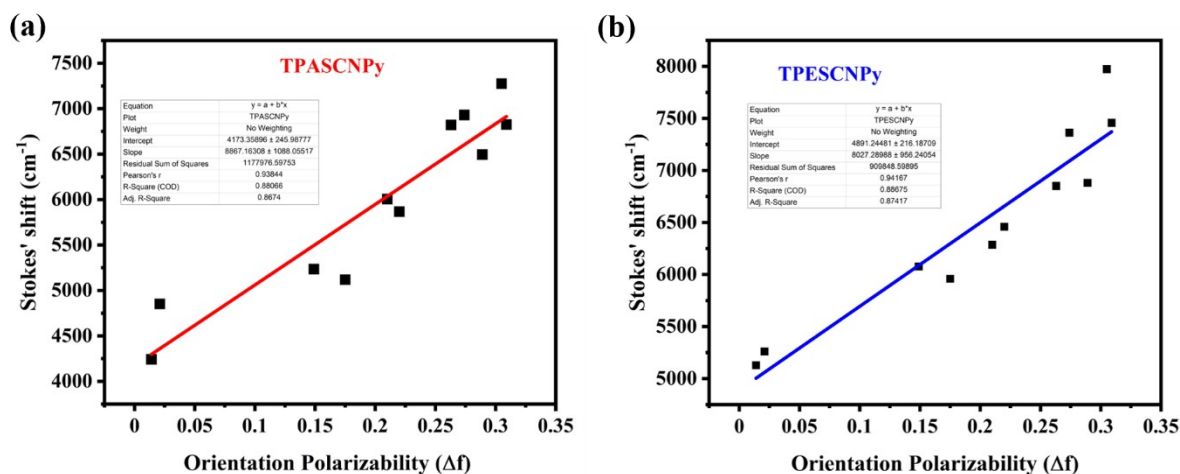

**Fig. S19** Lippert–Mataga plot depicting Stokes shift ( $\Delta\nu$ ) versus the solvent orientation polarizability ( $\Delta f$ ) of (a) TPASCNPY and (b) TPESCNPY.

The change of the dipole moment ( $\Delta\mu$ ) can be estimated using the equation (1) from the slope obtained from the L–M plot as following

$$(\mu_E - \mu_G)_2 = \frac{\text{Slope} * (hca^3)}{2} \dots\dots (S3)$$

$\Delta\mu = (\mu_E - \mu_G)$  is the change of dipole moment from the ground to an excited state.

**Table S3:** Fitting parameters of Lippert–Mataga plots and calculated Onsager radius (a), ( $\mu_E - \mu_G$ ) refers to the change in dipole moment. ( $R^2$ : regression coefficient).

| Compound | Slope (cm <sup>-1</sup> ) | R <sup>2</sup> | a (Å <sup>o</sup> ) | ( $\mu_E - \mu_G$ ) D |
|----------|---------------------------|----------------|---------------------|-----------------------|
| TPASCNPY | 8867                      | 0.880          | 7.04                | 17.5                  |
| TPESCNPY | 8027                      | 0.886          | 8.41                | 21.86                 |



## 7. Fluorescence Spectra of TPASCNP<sub>y</sub> and TPESCNP<sub>y</sub> in THF: water fraction and in thin film.

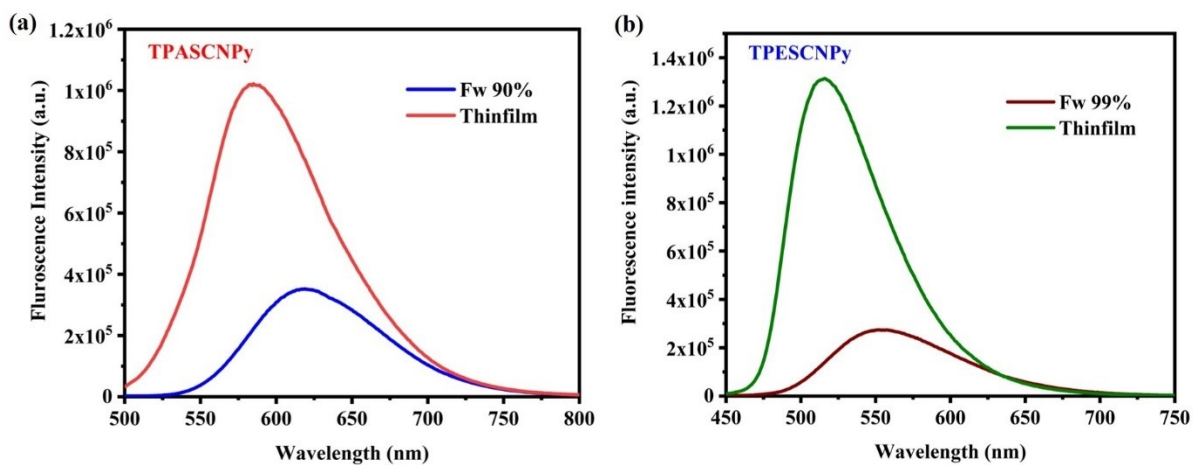

**Fig. S20** Fluorescence Spectra of (a) TPASCNP<sub>y</sub> and (b) TPESCNP<sub>y</sub> in THF: water fraction and in a thin film.

## 8. Application on paper strips

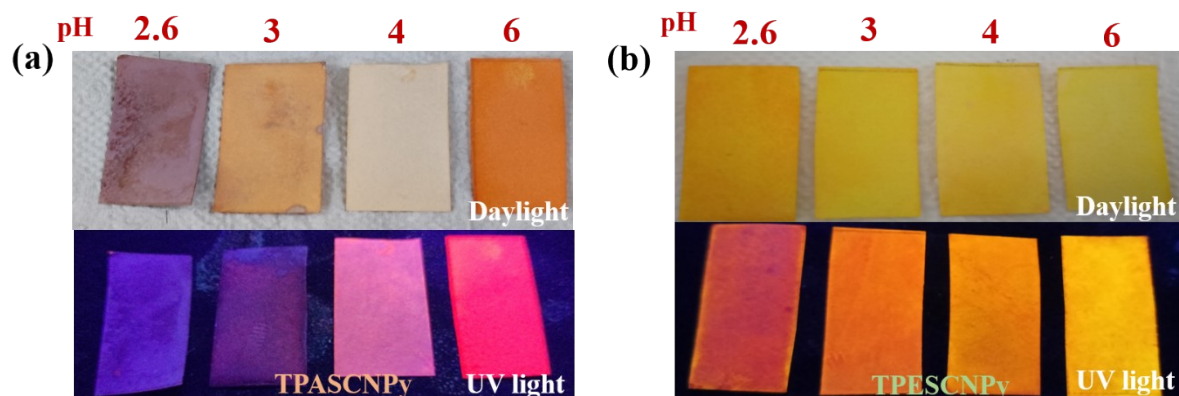

**Fig. S21** Photographs of test strips with (a) TPASCNP<sub>y</sub> ( $0.5 \times 10^{-3}$  M); and (b) TPESCNP<sub>y</sub> ( $0.5 \times 10^{-3}$  M) upon dipping in different pH solutions in daylight and UV light.

**Table S4.** The optimized geometry coordinates for **TPASCNP<sub>y</sub>**

|   |             |              |              |
|---|-------------|--------------|--------------|
| C | 5.196071000 | 3.634553000  | -1.124497000 |
| C | 4.662449000 | 2.352249000  | -1.044649000 |
| C | 5.144854000 | 1.446029000  | -0.091790000 |
| C | 6.175724000 | 1.844058000  | 0.768161000  |
| C | 6.714964000 | 3.122893000  | 0.670374000  |
| C | 6.226639000 | 4.026416000  | -0.271655000 |
| H | 4.813497000 | 4.324970000  | -1.867884000 |
| H | 3.871843000 | 2.046599000  | -1.719351000 |
| H | 7.513194000 | 3.416877000  | 1.342669000  |
| H | 6.645099000 | 5.023568000  | -0.341674000 |
| N | 4.605355000 | 0.129266000  | -0.005143000 |
| C | 0.401818000 | -0.484554000 | -0.035044000 |
| C | 1.280888000 | -1.411596000 | -0.623222000 |
| C | 2.651092000 | -1.213856000 | -0.617267000 |
| C | 3.211586000 | -0.074146000 | -0.014716000 |
| C | 2.340516000 | 0.857173000  | 0.575633000  |
| C | 0.970686000 | 0.654242000  | 0.560324000  |
| H | 0.881438000 | -2.283571000 | -1.127499000 |
| H | 3.298995000 | -1.937254000 | -1.095708000 |
| H | 2.746707000 | 1.736170000  | 1.059477000  |
| H | 0.331413000 | 1.379009000  | 1.052284000  |
| C | 5.498577000 | -0.976926000 | 0.097970000  |
| C | 5.276811000 | -1.986951000 | 1.042844000  |
| C | 6.156257000 | -3.060630000 | 1.139382000  |
| C | 7.275211000 | -3.135258000 | 0.311687000  |
| C | 7.503348000 | -2.126051000 | -0.621960000 |
| C | 6.620154000 | -1.057211000 | -0.736617000 |
| H | 4.416266000 | -1.924968000 | 1.697944000  |
| H | 5.972422000 | -3.834779000 | 1.875971000  |

|   |               |              |              |
|---|---------------|--------------|--------------|
| H | 7.961954000   | -3.969433000 | 0.394543000  |
| H | 8.367829000   | -2.174800000 | -1.274553000 |
| C | -3.560392000  | -0.489843000 | -0.009219000 |
| C | -3.116505000  | -1.797205000 | -0.139697000 |
| C | -1.716435000  | -1.916506000 | -0.159860000 |
| C | -1.039413000  | -0.714018000 | -0.047830000 |
| S | -2.178213000  | 0.598396000  | 0.072595000  |
| H | -3.784160000  | -2.643482000 | -0.204004000 |
| H | -1.206212000  | -2.868089000 | -0.222752000 |
| C | -4.868381000  | 0.088372000  | 0.061656000  |
| C | -6.097762000  | -0.498892000 | -0.042493000 |
| H | -4.878247000  | 1.164330000  | 0.202179000  |
| C | -9.724428000  | 0.507383000  | -0.356556000 |
| C | -8.558423000  | -0.243820000 | -0.460773000 |
| C | -7.362854000  | 0.263179000  | 0.066761000  |
| C | -7.437614000  | 1.514163000  | 0.697431000  |
| C | -8.654888000  | 2.182047000  | 0.744882000  |
| N | -9.793388000  | 1.705828000  | 0.229629000  |
| H | -10.653149000 | 0.122230000  | -0.768310000 |
| H | -8.581446000  | -1.209454000 | -0.951157000 |
| H | -6.573444000  | 1.960094000  | 1.173957000  |
| H | -8.720417000  | 3.150308000  | 1.233699000  |
| C | -6.219395000  | -1.897305000 | -0.294683000 |
| N | -6.329983000  | -3.030646000 | -0.499793000 |
| H | 6.795794000   | -0.278542000 | -1.468894000 |
| H | 6.551221000   | 1.146806000  | 1.507220000  |

**Table S5.** The optimized geometry coordinates for **TPESCNP<sub>y</sub>**

|   |              |              |              |
|---|--------------|--------------|--------------|
| C | 0.645748000  | 0.105078000  | 0.511547000  |
| C | -0.247759000 | -0.684361000 | 1.255636000  |
| C | -1.618498000 | -0.565795000 | 1.085536000  |
| C | -2.163601000 | 0.341540000  | 0.163599000  |
| C | -1.270028000 | 1.141452000  | -0.565862000 |
| C | 0.101986000  | 1.020535000  | -0.404580000 |
| H | 0.136589000  | -1.411768000 | 1.960631000  |
| H | -2.281627000 | -1.188862000 | 1.672320000  |
| H | -1.659670000 | 1.870518000  | -1.266461000 |
| H | 0.760234000  | 1.663510000  | -0.978147000 |
| C | 4.606648000  | -0.005531000 | 0.470487000  |
| C | 4.165137000  | -0.472104000 | 1.699042000  |
| C | 2.764870000  | -0.478909000 | 1.826198000  |
| C | 2.089328000  | -0.021702000 | 0.708950000  |
| S | 3.225870000  | 0.416536000  | -0.534876000 |
| H | 4.833361000  | -0.786805000 | 2.486642000  |
| H | 2.255702000  | -0.784312000 | 2.730167000  |
| C | 5.914906000  | 0.177295000  | -0.085781000 |
| C | 7.141707000  | -0.118061000 | 0.435894000  |
| H | 5.924651000  | 0.601883000  | -1.084414000 |
| C | 10.746601000 | -0.269127000 | -0.679968000 |
| C | 9.581832000  | -0.538644000 | 0.031154000  |
| C | 8.406506000  | 0.156051000  | -0.285113000 |
| C | 8.498755000  | 1.113513000  | -1.306017000 |
| C | 9.713036000  | 1.303068000  | -1.954163000 |
| N | 10.831876000 | 0.630829000  | -1.663408000 |
| H | 11.660078000 | -0.807871000 | -0.444109000 |
| H | 9.590354000  | -1.283655000 | 0.817534000  |

|   |              |              |              |
|---|--------------|--------------|--------------|
| H | 7.651821000  | 1.729486000  | -1.581803000 |
| H | 9.793208000  | 2.044393000  | -2.744527000 |
| C | 7.262098000  | -0.742430000 | 1.712763000  |
| N | 7.371774000  | -1.249918000 | 2.746631000  |
| C | -3.637059000 | 0.503461000  | -0.001444000 |
| C | -3.095240000 | -2.223063000 | -1.428932000 |
| C | -2.672118000 | -3.525604000 | -1.676363000 |
| C | -3.143464000 | -4.577212000 | -0.893311000 |
| C | -4.054229000 | -4.317485000 | 0.129628000  |
| C | -4.488575000 | -3.017197000 | 0.366919000  |
| C | -4.002019000 | -1.944917000 | -0.396285000 |
| H | -2.725574000 | -1.410643000 | -2.042898000 |
| H | -1.974764000 | -3.719131000 | -2.483869000 |
| H | -2.810929000 | -5.591392000 | -1.083653000 |
| H | -4.431730000 | -5.130163000 | 0.740350000  |
| H | -5.208408000 | -2.825168000 | 1.154516000  |
| C | -6.587291000 | 0.267286000  | 0.990305000  |
| C | -5.970211000 | -0.411946000 | -0.070116000 |
| C | -6.788783000 | -1.005420000 | -1.043193000 |
| C | -8.173987000 | -0.893265000 | -0.977237000 |
| C | -8.772486000 | -0.206284000 | 0.077491000  |
| C | -7.973135000 | 0.367119000  | 1.064285000  |
| H | -5.974036000 | 0.716297000  | 1.761961000  |
| H | -6.332097000 | -1.553308000 | -1.859572000 |
| H | -8.787091000 | -1.347802000 | -1.747606000 |
| H | -9.852181000 | -0.125488000 | 0.133853000  |
| H | -8.429078000 | 0.892082000  | 1.896368000  |
| C | -4.485029000 | -0.553602000 | -0.143713000 |
| C | -4.125873000 | 4.135851000  | 1.000297000  |
| C | -3.705796000 | 2.809364000  | 1.004550000  |

|   |              |             |              |
|---|--------------|-------------|--------------|
| C | -4.109996000 | 1.922071000 | -0.004371000 |
| C | -4.922523000 | 2.415045000 | -1.034872000 |
| C | -5.332110000 | 3.745061000 | -1.046678000 |
| C | -4.941111000 | 4.609455000 | -0.026195000 |
| H | -3.813117000 | 4.801455000 | 1.797240000  |
| H | -3.062927000 | 2.452182000 | 1.801298000  |
| H | -5.231344000 | 1.748856000 | -1.831251000 |
| H | -5.956923000 | 4.106644000 | -1.855808000 |
| H | -5.263389000 | 5.644590000 | -0.033839000 |
